# Supplementary material for: A multidimensional classification of public health activity in Australia
Source: Springer Nature journal article supplement (doi:10.1186/1743-8462-6-9), 2009-04-09
Supplement: Additional file 1 [file 1743-8462-6-9-s1.pdf]

## Additional file 1: Comparison of published public health functions and roles

| Canada 2003 (a)                                                                                                                                                                                                                                                                                 | UK 2003 (b)                                                                                                                                                                                                                                                                                                                                                                                                                                                                                                                                                                                                                                                                                                                                                                                                                                                                                                                                          | WHO 2003 (c)                                                                                                                                                                                                                                                                                                                                                                                                                                                                                                                                                                                                                                                                                                                                                                           | The Americas 2002 (d)                                                                                                                                                                                                                                                                                                                                                                                                                                                                                                                                                                                                                                                                                                                                                                                                                                                                                                                                                                                                                                                                             | OECD 2000 (e)                                                                                                                                                                                                                                                                                                                                                                                                                                                                                                                                                                               | Australia 2000 (f)                                                                                                                                                                                                                                                                                                                                                                                                                                                                                                                                                                                                                                                                                                                                                                                                                                                                                                                                                                                                                                                                                                                                                                                                                                                                                                                                                                         | USA 1994 (g), 1988 (h)                                                                                                                                                                                                                                                                                                                                                                                                                                                                                                                                                                                                                                                                                                                                                                                                                                                                                                                                                                                                                                                                                                                                                                                                                                                                                                                                                                                        |
|-------------------------------------------------------------------------------------------------------------------------------------------------------------------------------------------------------------------------------------------------------------------------------------------------|------------------------------------------------------------------------------------------------------------------------------------------------------------------------------------------------------------------------------------------------------------------------------------------------------------------------------------------------------------------------------------------------------------------------------------------------------------------------------------------------------------------------------------------------------------------------------------------------------------------------------------------------------------------------------------------------------------------------------------------------------------------------------------------------------------------------------------------------------------------------------------------------------------------------------------------------------|----------------------------------------------------------------------------------------------------------------------------------------------------------------------------------------------------------------------------------------------------------------------------------------------------------------------------------------------------------------------------------------------------------------------------------------------------------------------------------------------------------------------------------------------------------------------------------------------------------------------------------------------------------------------------------------------------------------------------------------------------------------------------------------|---------------------------------------------------------------------------------------------------------------------------------------------------------------------------------------------------------------------------------------------------------------------------------------------------------------------------------------------------------------------------------------------------------------------------------------------------------------------------------------------------------------------------------------------------------------------------------------------------------------------------------------------------------------------------------------------------------------------------------------------------------------------------------------------------------------------------------------------------------------------------------------------------------------------------------------------------------------------------------------------------------------------------------------------------------------------------------------------------|---------------------------------------------------------------------------------------------------------------------------------------------------------------------------------------------------------------------------------------------------------------------------------------------------------------------------------------------------------------------------------------------------------------------------------------------------------------------------------------------------------------------------------------------------------------------------------------------|--------------------------------------------------------------------------------------------------------------------------------------------------------------------------------------------------------------------------------------------------------------------------------------------------------------------------------------------------------------------------------------------------------------------------------------------------------------------------------------------------------------------------------------------------------------------------------------------------------------------------------------------------------------------------------------------------------------------------------------------------------------------------------------------------------------------------------------------------------------------------------------------------------------------------------------------------------------------------------------------------------------------------------------------------------------------------------------------------------------------------------------------------------------------------------------------------------------------------------------------------------------------------------------------------------------------------------------------------------------------------------------------|---------------------------------------------------------------------------------------------------------------------------------------------------------------------------------------------------------------------------------------------------------------------------------------------------------------------------------------------------------------------------------------------------------------------------------------------------------------------------------------------------------------------------------------------------------------------------------------------------------------------------------------------------------------------------------------------------------------------------------------------------------------------------------------------------------------------------------------------------------------------------------------------------------------------------------------------------------------------------------------------------------------------------------------------------------------------------------------------------------------------------------------------------------------------------------------------------------------------------------------------------------------------------------------------------------------------------------------------------------------------------------------------------------------|
| <p><b>Essential Public Health Functions:</b></p> <ul style="list-style-type: none"> <li>▪ Health protection</li> <li>▪ Health surveillance</li> <li>▪ Disease and injury prevention</li> <li>▪ Population health assessment</li> <li>▪ Health promotion</li> <li>▪ Disaster response</li> </ul> | <p><b>Public Health Core Functions:</b></p> <ul style="list-style-type: none"> <li>▪ Health surveillance, monitoring and analysis</li> <li>▪ Establishing, designing and managing health promotion and disease prevention programmes</li> <li>▪ Enabling and empowering communities and citizens to promote health and reduce inequalities</li> <li>▪ Creating and sustaining cross-governmental and inter-sectoral partnerships to improve health and reduce inequalities</li> <li>▪ Ensuring compliance with regulations and laws to protect and promote health</li> <li>▪ Developing and maintaining a well-educated and trained, multidisciplinary public health workforce</li> <li>▪ Ensuring the effective performance of NHS services to meet goals in improving health, preventing disease and reducing inequalities</li> <li>▪ Research, development, evaluation and innovation and quality assuring the public health function.</li> </ul> | <p><b>Essential Public Health Functions:</b></p> <ol style="list-style-type: none"> <li>1 Health situation monitoring &amp; analysis</li> <li>2 Epidemiological surveillance/ disease prevention &amp; control</li> <li>3 Development of policies &amp; planning in public health</li> <li>4 Strategic management of health systems &amp; services for population health gain.</li> <li>5 Regulation and enforcement to protect public health.</li> <li>6 Human resources development &amp; planning in public health.</li> <li>7 Health promotion, social participation &amp; empowerment</li> <li>8 Ensuring the quality of personal &amp; population-based health services.</li> <li>9 Research, development &amp; implementation of innovative public health solutions.</li> </ol> | <p><b>Public Health Roles:</b></p> <ul style="list-style-type: none"> <li>▪ Prevents epidemics and the spread of disease</li> <li>▪ Protects against environmental hazards</li> <li>▪ Prevents injuries</li> <li>▪ Promotes and encourages healthy behaviors</li> <li>▪ Responds to disasters and assists communities in recovery</li> <li>▪ Assures the quality and accessibility of health services</li> </ul> <p><b>Essential Public Health Functions:</b></p> <ol style="list-style-type: none"> <li>1 Health situation monitoring &amp; analysis</li> <li>2 Public health surveillance, research, &amp; control of risks &amp; damages in public health</li> <li>3 Health promotion</li> <li>4 Social participation &amp; empowerment of citizens in health</li> <li>5 Development of policy &amp; planning to support individual &amp; collective efforts in public health &amp; the steering role of the National Health Authority</li> <li>6 Public health regulation &amp; enforcement</li> <li>7 Evaluation &amp; promotion of equitable access to necessary health services</li> </ol> | <p><b>Prevention and public health services:</b></p> <ul style="list-style-type: none"> <li>▪ Maternal and child health; family planning and counselling</li> <li>▪ School health services</li> <li>▪ Prevention of communicable diseases</li> <li>▪ Prevention of non-communicable diseases</li> <li>▪ Occupational health care</li> <li>▪ All other miscellaneous public health services</li> </ul> <p><b>Health-related functions include:</b></p> <ul style="list-style-type: none"> <li>▪ Food, hygiene &amp; drinking water control; and</li> <li>▪ Environmental health).</li> </ul> | <p><b>Public Health Core Functions:</b></p> <ol style="list-style-type: none"> <li>1 Assess, analyse &amp; communicate population health needs &amp; community expectations</li> <li>2 Prevent &amp; control communicable &amp; non-communicable diseases &amp; injuries through risk factor reduction, education, screening, immunisation &amp; other interventions</li> <li>3 Promote &amp; support healthy lifestyles &amp; behaviours through action with individuals, families, communities &amp; wider society</li> <li>4 Promote, develop &amp; support healthy public policy, including legislation, regulation &amp; fiscal measures</li> <li>5 Plan, fund, manage &amp; evaluate health gain &amp; capacity building programmes designed to achieve measurable improvements in health status, &amp; to strengthen skills, competencies, systems &amp; infrastructure</li> <li>6 Strengthen communities &amp; build social capital through consultation, participation &amp; empowerment</li> <li>7 Promote, develop, support &amp; initiate actions which ensure safe &amp; healthy environments</li> <li>8 Promote, develop &amp; support healthy growth &amp; development throughout all life stages</li> <li>9 Promote, develop &amp; support actions to improve the health status of Aboriginal &amp; Torres Strait Islander people &amp; other vulnerable groups</li> </ol> | <p><b>Essential Public Health Services (1995):</b></p> <ol style="list-style-type: none"> <li>1 Monitor health status to identify community health problems.</li> <li>2 Diagnose &amp; investigate health problems &amp; health hazards in the community.</li> <li>3 Inform, educate, &amp; empower people about health issues.</li> <li>4 Mobilize community partnerships to identify &amp; solve health problems.</li> <li>5 Develop policies &amp; plans that support individual &amp; community health efforts.</li> <li>6 Enforce laws &amp; regulations that protect health &amp; ensure safety.</li> <li>7 Link people to needed personal health services &amp; assure the provision of health care when otherwise unavailable.</li> <li>8 Assure a competent public health &amp; personal health workforce.</li> <li>9 Evaluate effectiveness, accessibility, &amp; quality of personal &amp; population-based health services.</li> <li>10 Research for new insights &amp; innovative solutions to health problems.</li> </ol> <p><b>Public Health Core Functions (1988):</b></p> <ul style="list-style-type: none"> <li>▪ <i>Assessment</i> - of a community's health and its resources.</li> <li>▪ <i>Policy development</i> - to promote health and solve health problems.</li> <li>▪ <i>Assurance</i> - that access to health care, promotion, and prevention services are available.</li> </ul> |

**Sources:**

- (a) National Advisory Committee on SARS and Public Health: Learning from SARS: Renewal of public health in Canada. Ottawa: Health Canada; 2003 [16].
- (b) Chief Medical Officer, United Kingdom: Public health in England. London: UK Dept of Health; 2003 [11].
- (c) World Health Organization (WHO), Regional Office for the Western Pacific: Essential public health functions: A three-country study in the Western Pacific Region. Manila, Philippines; 2003 [13].
- (d) Pan American Health Organization: Public Health in the Americas: conceptual renewal, performance assessment, and bases for action. Washington, DC; 2002 [14].
- (e) Ramagem C, Ruales J: The essential public health functions as a strategy for improving overall health systems performance: trends and challenges since the Public Health in the Americas Initiative, 2000-2007. Washington, DC: Pan American Health Organization/World Health Organization; 2008 [15].
- (f) Organisation for Economic Co-operation and Development (OECD): International Classification of Health Accounts. Geneva; 2000 [28].
- (g) National Public Health Partnership: Public health practice in Australia today – a statement of core functions. Melbourne; 2000 [2].
- (h) Public Health Functions Steering Committee, US Department of Health and Human Services: Public health in America. Washington DC: US Department of Health and Human Services; 1994 [10].
- (i) Institute of Medicine: The future of public health. Washington, DC: National Academy Press; 1988 [9].
