# Supplementary material for: A multidimensional classification of public health activity in Australia
Source: Springer Nature journal article supplement (doi:10.1186/1743-8462-6-9), 2009-04-09
Supplement: Additional file 2 [file 1743-8462-6-9-s2.pdf]

## Additional file 2: Classification of public health: detail of the functions class

| Top-level                                                 | Level 2                                                   |                                                                                                                                                                                                  | Level 3                                                  |                                                                                                                                                                                                                     |
|-----------------------------------------------------------|-----------------------------------------------------------|--------------------------------------------------------------------------------------------------------------------------------------------------------------------------------------------------|----------------------------------------------------------|---------------------------------------------------------------------------------------------------------------------------------------------------------------------------------------------------------------------|
|                                                           | Class                                                     | Definition                                                                                                                                                                                       | Class                                                    | Definition                                                                                                                                                                                                          |
| <b>Functions:<br/>Primary functions (ends)</b>            | Assess health of populations                              | Monitor and analyse health and determinants of health in populations, assess the impacts of policies, interventions, and environmental exposures.                                                | Monitor health                                           | Monitor and analyse levels of health and its determinants in populations to identify and predict trends and emerging issues                                                                                         |
|                                                           |                                                           |                                                                                                                                                                                                  | Evaluate health risks and benefits                       | Evaluate adverse and beneficial effects related to health and social policies and interventions, and environmental exposures.                                                                                       |
|                                                           |                                                           |                                                                                                                                                                                                  | Assess health inequalities                               | Assess inequalities in health (level and distribution) and health gain to target interventions to improve the health of the worst-off sub-populations.                                                              |
|                                                           | Protect from threats to health                            | Protect from, and prevent, external threats to public health.                                                                                                                                    | Prepare for threats to health                            | Minimise or reduce the severity of risks to health (includes setting and monitoring of standards for e.g. food, air and water quality and other potential hazards, also harm minimisation measures).                |
|                                                           |                                                           |                                                                                                                                                                                                  | Respond to threats to health                             | Respond to threats to health (including communicable diseases, environmental hazards, bio-terrorism and other disasters).                                                                                           |
|                                                           |                                                           |                                                                                                                                                                                                  | Control and mitigate risks to health                     | Identify and prepare for potential threats to health (including communicable diseases, environmental hazards, bio-terrorism and new patterns of exposures e.g. arising from ecological change).                     |
|                                                           | Promote health and prevent disease, disability and injury | Promote health and wellbeing, prevent the occurrence of disease, disability and injury; and detect disease in its early stages, through organised efforts that target populations.               | Promote health and wellbeing                             | Promote better health and well-being as it affects health (e.g. community development and community empowerment initiatives clearly differentiated from 'Prevent the occurrence of...').                            |
|                                                           |                                                           |                                                                                                                                                                                                  | Prevent the occurrence of disease, disability and injury | Prevent the initial occurrence of disease, disability and injury (e.g. population-level campaigns to promote physical activity, tobacco control, seat belt legislation).                                            |
|                                                           |                                                           |                                                                                                                                                                                                  | Detect disease, disability or injury in its early stages | Detect disease, disability and risk of injury early and initiate prompt management or response (e.g. screening for cancers, newborn hearing screening).                                                             |
| <b>Instrumental functions<br/>(means to achieve ends)</b> | Ensure public health capability                           | Ensure adequate public health capacity and responsiveness by maintaining and developing the public health workforce and infrastructure, and building partnerships with other sectors of society. | Develop and maintain the public health workforce         | Train, maintain and develop the public health workforce.                                                                                                                                                            |
|                                                           |                                                           |                                                                                                                                                                                                  | Develop and maintain public health infrastructure        | Build, maintain and develop public health infrastructure, including physical, organisational, legislative, communication and informational, logistical, and other systems forming the public health infrastructure. |
|                                                           |                                                           |                                                                                                                                                                                                  | Build public health partnerships                         | Build and maintain public health partnerships with other sectors and the community, to work together on shared issues and undertake actions towards agreed targets.                                                 |
|                                                           | Build the evidence base for public health                 | Increase and enhance the bodies of knowledge and evidence that inform public health practice (e.g. research, research synthesis, evaluation).                                                    | Conduct public health research                           | Conduct public health research.                                                                                                                                                                                     |
|                                                           |                                                           |                                                                                                                                                                                                  | Evaluate public health interventions                     | Evaluate public health interventions.                                                                                                                                                                               |
